# Supplementary material for: Trends in Current Electronic Cigarette Use Among Youths by Age, Sex, and Race and Ethnicity
Source: PubMed Central journal article supplement (PMC10844997; doi:10.1001/jamanetworkopen.2023.54872), 2024-02-05
Supplement: jamanetwopen-e2354872-s001.pdf [file jamanetwopen-e2354872-s001.pdf]

## Data Sharing Statement

Mattingly. Trends in Current Electronic Cigarette Use Among Youths by Age, Sex, and Race and Ethnicity. *JAMA Netw Open*. Published online February 5, 2024. doi:10.1001/jamanetworkopen.2023.54872

## Data

**Data available:** No

## Additional Information

**Explanation for why data not available:** The data are publicly available at the CDC ([https://www.cdc.gov/tobacco/data\\_statistics/surveys/nyts/index.htm](https://www.cdc.gov/tobacco/data_statistics/surveys/nyts/index.htm))
